# Supplementary material for: Nickel and cobalt transfigured natural clay: a green catalyst for low-temperature catalytic soot oxidation
Source: Royal Society of Chemistry journal article supplement (doi:10.1039/d1nj01346g), 2021-01-01
Supplement: d1nj01346g1.pdf [file d1nj01346g1.pdf]

## SUPPORTING INFORMATION

### **Nickel and Cobalt Transfigured Natural Clay: A Green Catalyst for Efficient Low-Temperature Catalytic Soot Oxidation**

Devika Laishram,<sup>a</sup> R. Krishnapriya,<sup>a</sup> Bhagirath Saini,<sup>a</sup> Unnati Gupta,<sup>a</sup> Vineet Kumar Soni,<sup>a</sup> and Rakesh K Sharma\*<sup>a</sup>

<sup>a</sup>Sustainable Materials and Catalysis Research Laboratory (SMCRL), Department of Chemistry, Indian Institute of Technology Jodhpur, NH 65, Karwar, Jodhpur, Rajasthan, India, 342037 Tel.: +91 291 280 1303, E-mail: [rks@iitj.ac.in](mailto:rks@iitj.ac.in)

### **Contents**

|                                                                                                                                                                                                                                                                                                                                                      |              |
|------------------------------------------------------------------------------------------------------------------------------------------------------------------------------------------------------------------------------------------------------------------------------------------------------------------------------------------------------|--------------|
| 1. Figure S1<br>HRTEM analysis                                                                                                                                                                                                                                                                                                                       | Page No. 2   |
| 2. Figure S2<br>HR XPS of C1s (a, b) and K 2p (c, d) Clay and NC-Clay catalyst.                                                                                                                                                                                                                                                                      | Page No. 2   |
| 3. Figure S3<br>Elemental mapping of NC-Clay                                                                                                                                                                                                                                                                                                         | Page No. 3   |
| 4. Figure S4.<br>Soot oxidation of bare carbon in the absence of catalyst                                                                                                                                                                                                                                                                            | Page No. 3   |
| 5. Figure S5.<br>Recyclability test of the synthesized NC-Clay catalyst.                                                                                                                                                                                                                                                                             | Page No. 4   |
| 6. Figure S6.<br>Calculation of activation energies using Friedman method (a-d) Carbon sample at different heating rates without the catalyst and the synthesized catalysts (e) at equal concentration of Ni and Co doped in Clay, (f) and (g) metal doping Co-Clay and Ni-Clay respectively and (h) without any metal dopant only Clay as catalyst. | Page No. 5   |
| 7. Figure S7.<br>XPS analysis, XRD and TEM characterization of the spent catalyst.                                                                                                                                                                                                                                                                   | Page No. 6   |
| 8. Table S1<br>O <sub>2</sub> TPD and H <sub>2</sub> TPR peak fitting detail of both Clay and NC-Clay catalyst                                                                                                                                                                                                                                       | Page No. 6   |
| 9. Table S2<br>Literature Survey                                                                                                                                                                                                                                                                                                                     | Page No. 7-9 |

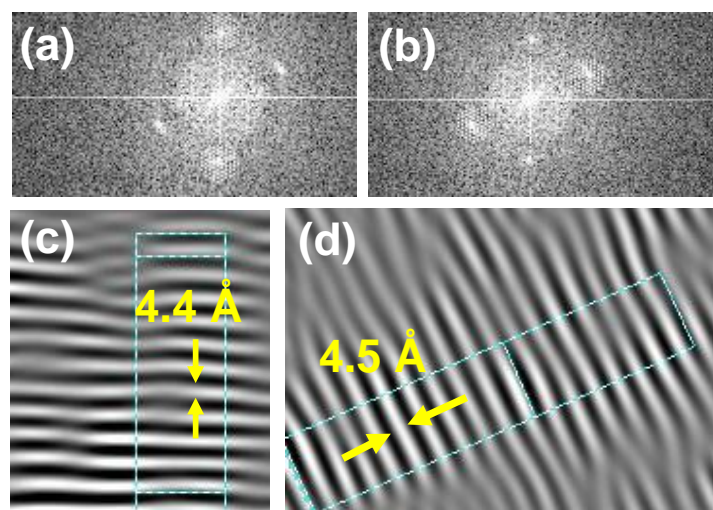

Figure S1. (a, b) FFT image and (c and d) IFFT image showing d-spacing.

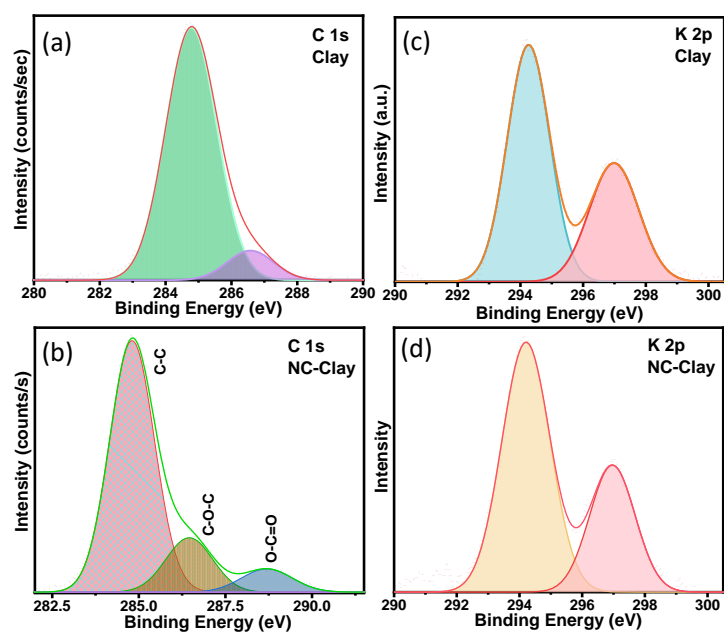

Figure S2. HR XPS of C1s (a, b) and K 2p (c, d) Clay and NC-Clay catalyst.

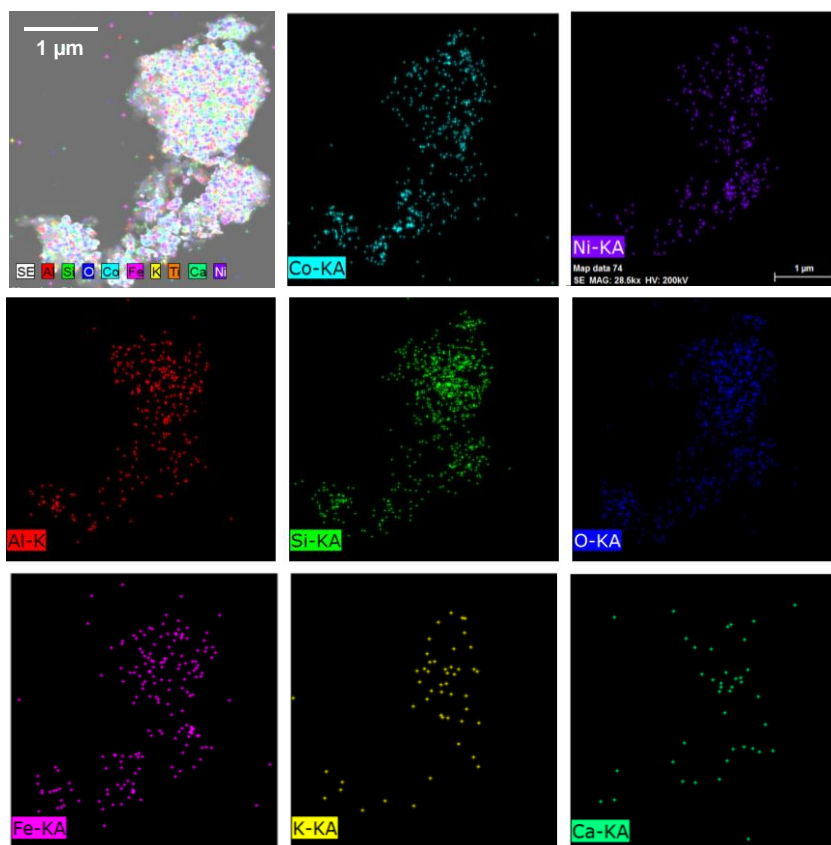

Figure S3. FESEM elemental mapping of NC-Clay catalyst.

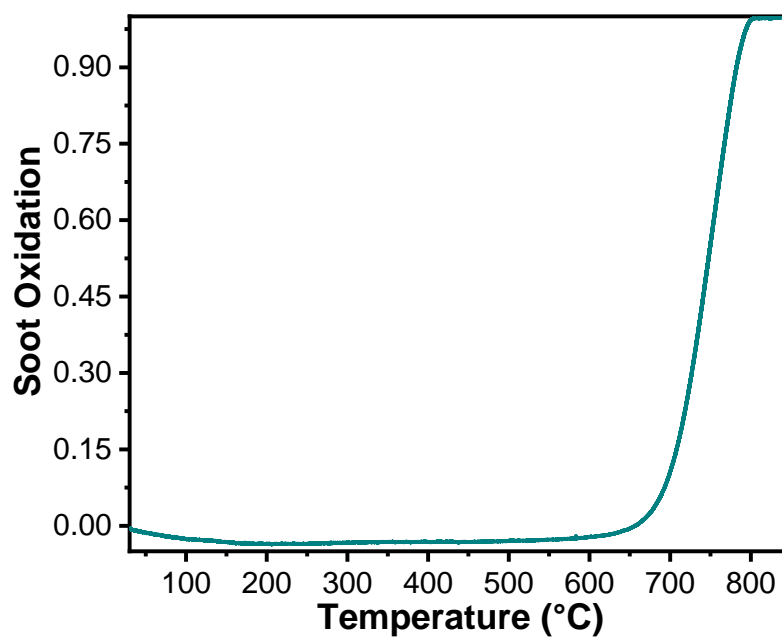

Figure S4. Soot oxidation of bare carbon in the absence of catalyst.

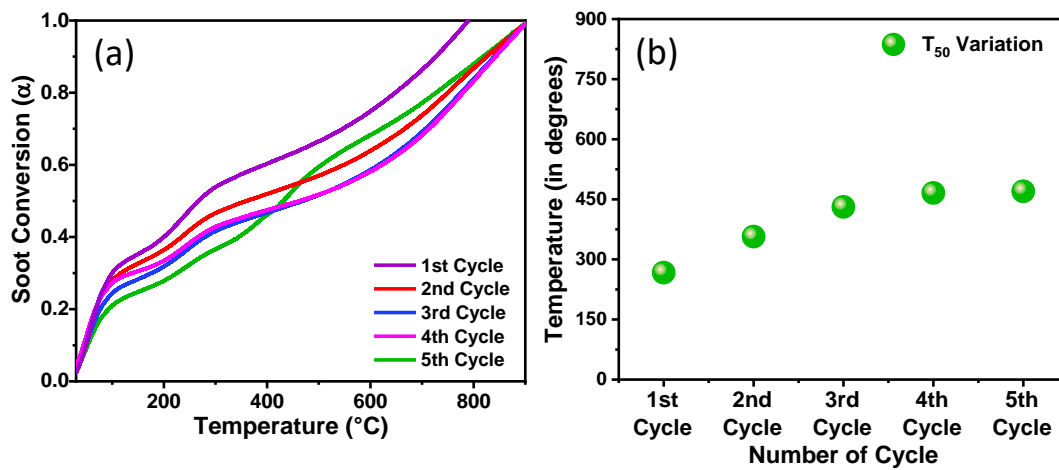

Figure S5. Recyclability test of the synthesized NC-Clay catalyst.

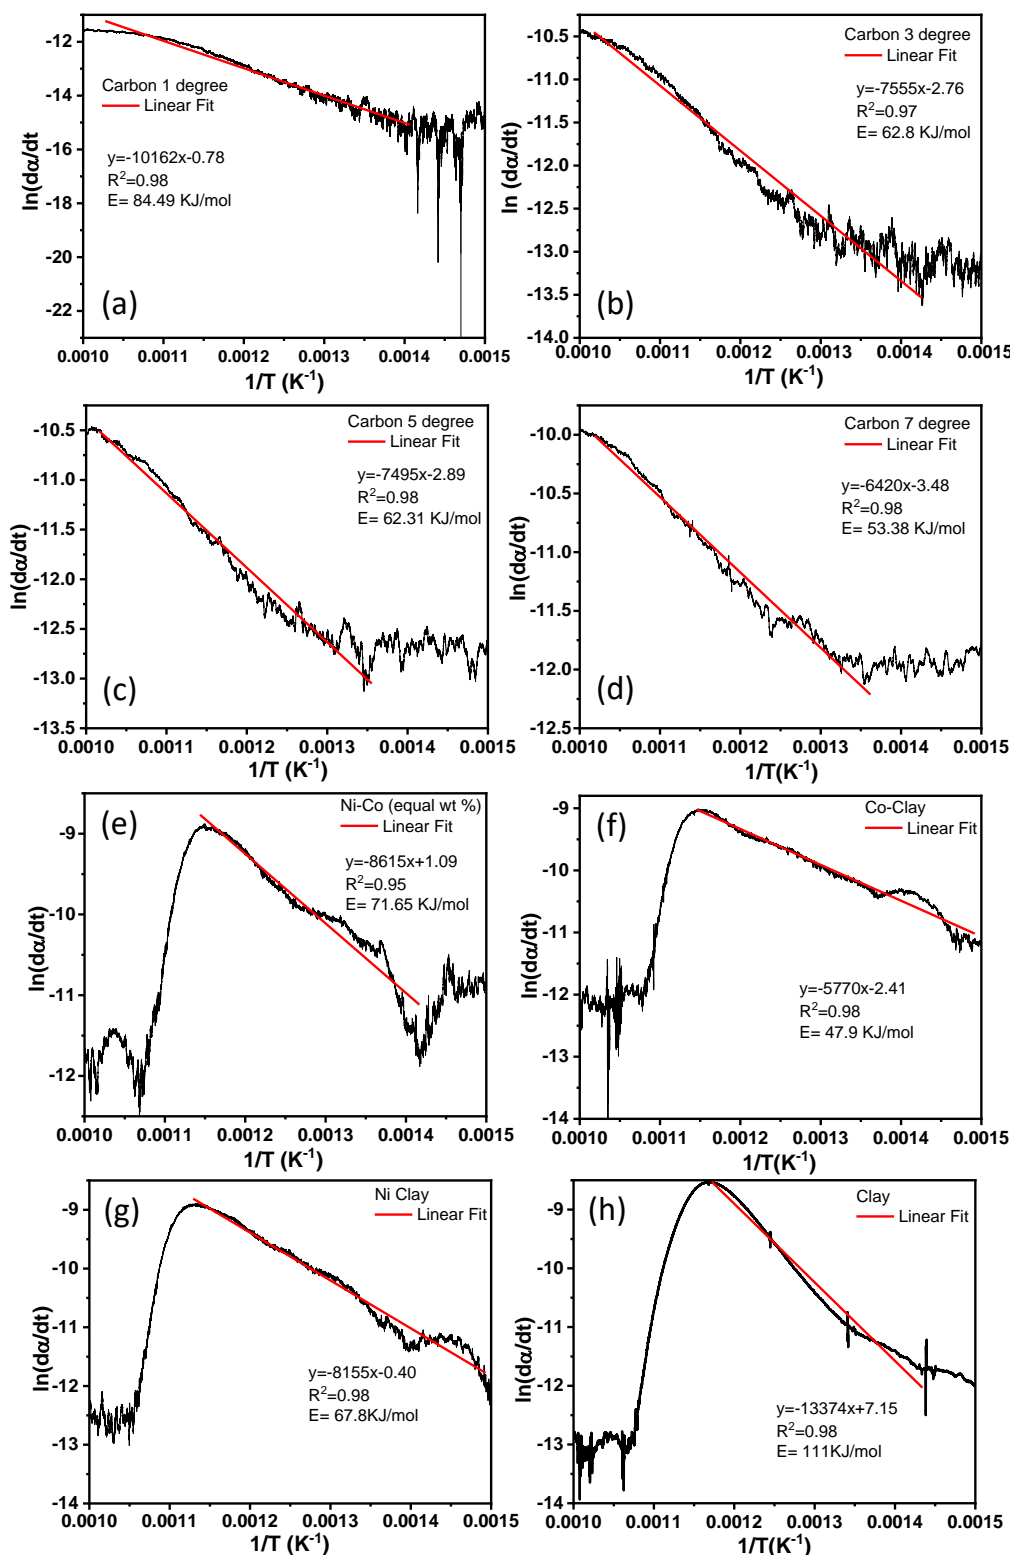

Figure S6. Calculation of activation energies using Friedman method (a-d) Carbon sample at different heating rates without the catalyst and the synthesized catalysts (e) at equal concentration of Ni and Co doped in Clay, (f) and (g) metal doping Co-Clay and Ni-Clay respectively and (h) without any metal dopant only Clay as catalyst.

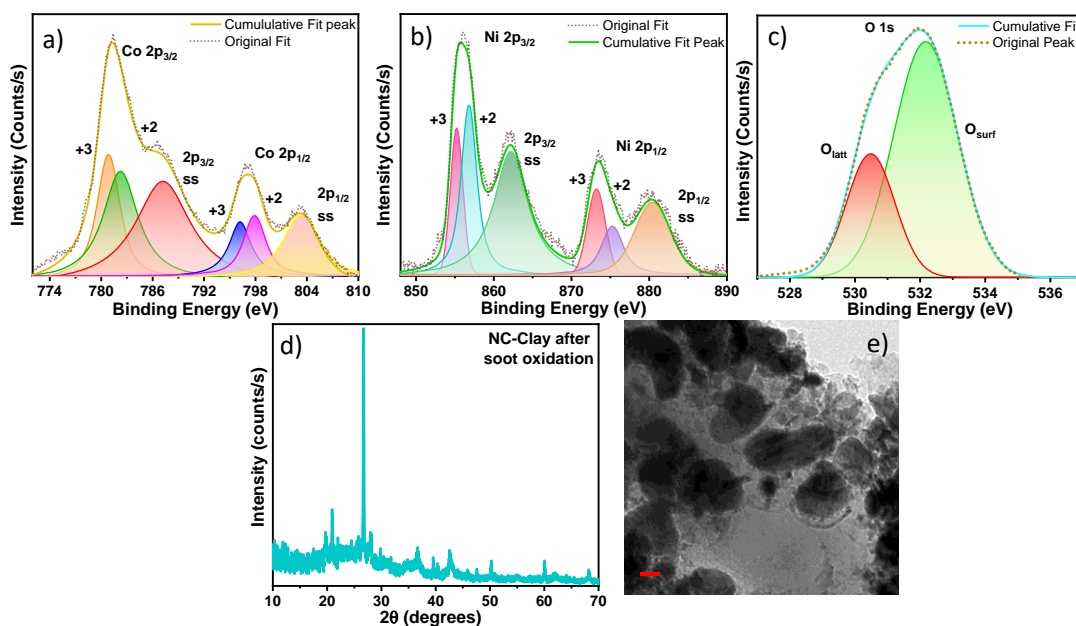

Figure S7. XPS analysis, XRD and TEM characterization of the spent catalyst.

Table S1. O<sub>2</sub> TPD and H<sub>2</sub> TPR peak fitting detail of both Clay and NC-Clay catalyst.

|                                | Peak Index | Peak Type | Area Intg | FWHM    | Max Height | Center Grvty | Area IntgP | Max Height | FWHM   |
|--------------------------------|------------|-----------|-----------|---------|------------|--------------|------------|------------|--------|
| H <sub>2</sub> TPR for Clay    | 1          | Gaussian  | 1350.67   | 111.49  | 11.38      | 553.57       | 55.61      | 11.38      | 111.49 |
|                                | 2          | Gaussian  | 49.24     | 16.37   | 2.826      | 796.87       | 2.03       | 2.84       | 16.37  |
|                                | 3          | Gaussian  | 201.41    | 91.24   | 2.07       | 645.60       | 8.29       | 2.07       | 91.24  |
|                                | 4          | Gaussian  | 767.23    | 91.50   | 7.93       | 793.29       | 31.59      | 7.93       | 91.50  |
| H <sub>2</sub> TPR for NC-Clay | 1          | Gaussian  | 3656.54   | 3656.54 | 30.62      | 263.72       | 263.72     | 46.15      | 74.44  |
|                                | 2          | Gaussian  | 4526.62   | 4526.62 | 37.90      | 471.07       | 471.07     | 22.97      | 185.16 |
|                                | 3          | Gaussian  | 2039.03   | 2039.03 | 17.07      | 607.96       | 607.96     | 13.64      | 140.40 |
|                                | 4          | Gaussian  | 1230.03   | 1216.84 | 10.19      | 736.83       | 736.83     | 6.69       | 172.76 |
|                                | 5          | Gaussian  | 504.57    | 504.33  | 4.22       | 208.66       | 208.67     | 3.93       | 120.51 |
| O <sub>2</sub> TPD for Clay    | 1          | PsdVoigt1 | 59.58     | 60.43   | 17.98      | 512.99       | 512.99     | 0.64       | 92.87  |
|                                | 2          | PsdVoigt1 | 115.35    | 102.55  | 30.52      | 699.69       | 699.69     | 0.79       | 73.97  |
|                                | 3          | PsdVoigt1 | 98.19     | 97.26   | 28.94      | 643.65       | 643.65     | 1.81       | 47.24  |
|                                | 4          | PsdVoigt1 | 77.89     | 75.77   | 22.55      | 611.78       | 611.78     | 0.86       | 72.57  |
|                                | 1          | PsdVoigt1 | 59.58     | 60.43   | 17.98      | 512.99       | 512.99     | 0.64       | 92.87  |
|                                | 1          | Gaussian  | 19.17     | 19.17   | 5.59       | 240.38       | 240.38     | 0.24       | 74.06  |

|                                             |   |          |        |        |       |        |        |      |        |
|---------------------------------------------|---|----------|--------|--------|-------|--------|--------|------|--------|
| O <sub>2</sub><br>TPD<br>for<br>NC-<br>Clay | 2 | Gaussian | 12.36  | 12.36  | 3.60  | 387.57 | 387.57 | 0.22 | 53.89  |
|                                             | 3 | Gaussian | 13.87  | 13.87  | 4.05  | 438.98 | 438.98 | 0.24 | 54.46  |
|                                             | 4 | Gaussian | 121.38 | 120.16 | 35.05 | 719.52 | 719.53 | 0.65 | 176.09 |
|                                             | 5 | Gaussian | 19.80  | 19.79  | 5.77  | 811.94 | 811.94 | 0.32 | 58.02  |
|                                             | 6 | Gaussian | 157.50 | 157.50 | 45.94 | 485.95 | 485.95 | 0.68 | 217.56 |

Table S2. Literature survey

| SI No | Doping material                                                                                                                                                                                                                                                                                                                                                                                                                                                                                                                                                                                                                 | T <sub>50</sub> (°C)                                 | Reaction conditions                                                                                                                                                                         | O <sub>2</sub> TPD                    | References                                                                                          |
|-------|---------------------------------------------------------------------------------------------------------------------------------------------------------------------------------------------------------------------------------------------------------------------------------------------------------------------------------------------------------------------------------------------------------------------------------------------------------------------------------------------------------------------------------------------------------------------------------------------------------------------------------|------------------------------------------------------|---------------------------------------------------------------------------------------------------------------------------------------------------------------------------------------------|---------------------------------------|-----------------------------------------------------------------------------------------------------|
| 1.    | Co <sub>3</sub> O <sub>4</sub><br>Zn <sub>0.5</sub> Co <sub>2.5</sub> O <sub>4</sub><br>NiO<br>ZnO                                                                                                                                                                                                                                                                                                                                                                                                                                                                                                                              | 412<br>423<br>462<br>575                             | Loose contact, soot/catalyst = 0.1,<br>5% O <sub>2</sub> in N <sub>2</sub> , NO/5% O <sub>2</sub> /N <sub>2</sub> ,<br>300 mL min <sup>-1</sup> .                                           | NA                                    | Zhao <i>et al.</i> ,<br><i>ACS Catal.</i><br>2019, 9,<br>7548–7567                                  |
| 2.    | pure Co <sub>3</sub> O <sub>4</sub><br>pure Sr(NO <sub>3</sub> ) <sub>2</sub><br>Co <sub>3</sub> O <sub>4</sub> /Sr(NO <sub>3</sub> ) <sub>2</sub> ) 1:2<br>Co <sub>3</sub> O <sub>4</sub> /Sr(NO <sub>3</sub> ) <sub>2</sub> ) 1:1<br>Co <sub>3</sub> O <sub>4</sub> /Sr(NO <sub>3</sub> ) <sub>2</sub> ) 2:1<br>Co <sub>3</sub> O <sub>4</sub> /Sr(NO <sub>3</sub> ) <sub>2</sub> /KNO <sub>3</sub> )<br>0.5:0.25:2<br>Co <sub>3</sub> O <sub>4</sub> /Sr(NO <sub>3</sub> ) <sub>2</sub> /KNO <sub>3</sub> )<br>0.5:0.5:2<br>Co <sub>3</sub> O <sub>4</sub> /Sr(NO <sub>3</sub> ) <sub>2</sub> /KNO <sub>3</sub> )<br>0.5:1:2 | 554<br>524<br>534<br>519<br>529<br>456<br>469<br>480 | Tight contact,<br>Catalyst/soot=3/1 heating rate<br>10 °C/min from RT to 650 °C in<br>the air.                                                                                              | NA                                    | Sui <i>et al.</i> ,<br><i>Energy &amp;<br/>Fuels.</i> 2007,<br>21, 1420-1424                        |
| 3.    | ZnCo <sub>2</sub> O <sub>4</sub><br>CuCo <sub>2</sub> O <sub>4</sub><br>Co <sub>3</sub> O <sub>4</sub><br>NiCo <sub>2</sub> O <sub>4</sub> .                                                                                                                                                                                                                                                                                                                                                                                                                                                                                    | 569<br>574<br>580<br>585                             | Loose contact, soot/catalyst=1/9<br>N <sub>2</sub> 10 vol.% (300 mL min <sup>-1</sup> ).<br>1000 ppm NO, 5 vol.% H <sub>2</sub> O and<br>100 ppm SO <sub>2</sub>                            | 839<br>805, 863<br>837<br>770         | Zang <i>et al.</i> ,<br><i>Aerosol and<br/>Air Quality<br/>Research.</i><br>2017,17, 2317–<br>2327. |
| 4.    | 0.6Co/Fe-NF                                                                                                                                                                                                                                                                                                                                                                                                                                                                                                                                                                                                                     | 382 °C                                               | Loose contact,<br>Soot/catalyst=1/10 200 -650 °C,<br>heating rate of 2 °C min <sup>-1</sup> , 300<br>ppm NO and 5% O <sub>2</sub> balanced by<br>N <sub>2</sub> (50 mL min <sup>-1</sup> ). | NA                                    | Cao <i>et al.</i> ,<br><i>Nanoscale.</i><br>2016, 8, 5857                                           |
| 5.    | p-HfO <sub>2</sub><br>H-HfO <sub>2</sub> 2h<br>H-HfO <sub>2</sub> 6h<br>H-HfO <sub>2</sub> 10h<br>carbon                                                                                                                                                                                                                                                                                                                                                                                                                                                                                                                        | 644<br>632<br>646<br>649<br>745                      | Tight contact, Soot/catalyst=1/4<br>30-900 °C, 20 mL/min under<br>zero air, 10 °C/min heating rate                                                                                          | 187.7<br>161.4<br>154.7<br>126.8<br>- | Laishram <i>et al.</i> ,<br><i>ACS<br/>Sustainable<br/>Chem. Eng.</i><br>2018, 6,<br>11286–11294    |
| 6.    | CeO <sub>2</sub> (conventional)<br>CeO <sub>2</sub> -CV<br>CeO <sub>2</sub> -NC<br>CeO <sub>2</sub> -NR                                                                                                                                                                                                                                                                                                                                                                                                                                                                                                                         | 680<br>720<br>687<br>683                             | Tight contact, soot/catalyst=<br>1/20 (60mL/min), mixture pre-<br>treated<br>for 1h at 423 K then heating rate<br>(10 K/min) up to 1073 K.                                                  |                                       | Aneggi <i>et al.</i><br><i>ACS Catal.</i><br>2014, 4,<br>172–181                                    |

|     |                                                                                                                                                                                                                                                                                                 |                                        |                                                                                                                                                                                                                                           |                                                   |                                                                    |
|-----|-------------------------------------------------------------------------------------------------------------------------------------------------------------------------------------------------------------------------------------------------------------------------------------------------|----------------------------------------|-------------------------------------------------------------------------------------------------------------------------------------------------------------------------------------------------------------------------------------------|---------------------------------------------------|--------------------------------------------------------------------|
| 7.  | PtAl<br>PtZSM5<br>ZSM5<br>uncatalyzed                                                                                                                                                                                                                                                           | 460<br>440<br>563<br>570               | Loose contact, soot/catalyst=1/10<br>1000 ppm NO/10% O <sub>2</sub> /N <sub>2</sub> (500 mL/min) or 10% O <sub>2</sub> /N <sub>2</sub> (500 mL/min) temp ramped to 600 °C<br>10 °C/min heating rate                                       | NO-TPD<br>NH <sub>3</sub> -TPD                    | Liu <i>et al.</i> , <i>ACS Catal.</i> 2015, 5, 909–919             |
| 8.  | hydrotalcites<br>Mn <sub>0.5</sub> Mg <sub>2.5</sub> AlO<br>Mn <sub>0.5</sub> Mg <sub>2.5</sub> Ce <sub>0.1</sub> Al <sub>0.9</sub> O<br>Mn <sub>0.5</sub> Mg <sub>2.5</sub> Ce <sub>0.3</sub> Al <sub>0.7</sub> O<br>Mn <sub>0.5</sub> Mg <sub>2.5</sub> Ce <sub>0.5</sub> Al <sub>0.5</sub> O | 544<br>495<br>498<br>503               | Tight contact, soot/catalyst= 1/9<br>gas flow with 5% O <sub>2</sub> or 5% O <sub>2</sub> +1000 ppm NO balanced by He (100 mL/min)                                                                                                        | TPO                                               | Qian <i>et al.</i> <i>Journal of rare earths.</i> 2014, 32,176     |
| 9.  | Pure soot<br>HBeta<br>Mn–HBeta                                                                                                                                                                                                                                                                  | 570<br>545<br>485                      | Loose contact, soot/catalyst =1:10<br>mixed with 200 mg silica pellets.<br>500 ppm NO, 10% O <sub>2</sub> and balance N <sub>2</sub> was feed with a flow rate 200 mL min <sup>-1</sup>                                                   | NH <sub>3</sub> -TPD                              | Zhou <i>et al.</i> <i>J. Mater. Chem. A</i> , 2015, 3, 9745–9753   |
| 10. | AgCe-0.03<br>AgCe-0.02<br>AgCe-0.01<br>AgCe-0.04<br>AgCe-0.05<br>AgCe-0                                                                                                                                                                                                                         | 449<br>456<br>460<br>462<br>468<br>476 | Loose contact, soot/catalyst =1:10<br>mixed with 300 mg silica pellets<br>1% O <sub>2</sub> /N <sub>2</sub> (500 ml min <sup>-1</sup> )                                                                                                   | TPO                                               | Wang <i>et al.</i> <i>Catal. Sci. Technol.</i> 2017, 7, 2129       |
| 11. | Pristine CeO <sub>2</sub><br>Ce–Sm<br>Ce–Sm/Al <sub>2</sub> O <sub>3</sub><br>Uncatalysed soot                                                                                                                                                                                                  | 562<br>419<br>424<br>607               | Tight contact, catalyst/soot=4/1<br>heating rate 10 K min <sup>-1</sup> from RT to 1273 K under oxygen flow<br>100 mL min <sup>-1</sup>                                                                                                   | NA                                                | Sudarsanam <i>et al.</i> , <i>New J. Chem.</i> 2014, 38, 5991      |
| 12. | PtZ-1<br>PtZ-2<br>PtAl                                                                                                                                                                                                                                                                          | 441<br>433<br>446                      | Loose contact, soot/catalyst =1/5<br>mixed with 300 mg silica pellets<br>500 ppm NO/10% O <sub>2</sub> /N <sub>2</sub> or 10% O <sub>2</sub> /N <sub>2</sub> GHSV= 30 000 h <sup>-1</sup> heated to 600 °C rate 10 °C min <sup>-1</sup> . | NO-TPD<br>NH <sub>3</sub> -TPD                    | Gao <i>et al.</i> <i>Catal. Sci. Technol.</i> 2017, 7, 3268        |
| 13. | WPtAl<br>WPtAl–A<br>WPtAl–SA<br>PtAl<br>PtAl–A<br>PtAl–SA                                                                                                                                                                                                                                       | 461<br>469<br>473<br>473<br>474<br>489 | Loose contact, soot/catalyst =1:10<br>mixed with 300 mg of silica pellets. 1000 ppm NO/10% O <sub>2</sub> /N <sub>2</sub> total flow rate of 500 mL min <sup>-1</sup> .                                                                   | NO-TPD<br>TPO                                     | Wu, <i>et al.</i> , <i>Catal. Sci. Technol.</i> , 2011, 1, 644–651 |
| 14. | h-CeO <sub>2</sub> /SiO <sub>2</sub><br>MnO <sub>x</sub> /SiO <sub>2</sub><br>Soot                                                                                                                                                                                                              | 430<br>490<br>650                      | Tight contact CeO <sub>2</sub> /Si O/soot =7.2/11.8/1.<br>heated from rt to 750 °C heating rate of 10°C/min (80 ml/min) of 10 % v/v O <sub>2</sub> balanced with He.                                                                      | CO-TPR                                            | Wu <i>et al.</i> , <i>ACS Appl. Nano Mater.</i> 2018, 1, 1438–1443 |
| 15. | La <sub>0.7</sub> Ce <sub>0.3</sub> Fe <sub>0.4</sub> Co <sub>0.6</sub> O <sub>3</sub><br>(3DOM)                                                                                                                                                                                                | 410                                    | Loose contact, soot: catalyst=1:9<br>heated from 200-650 °C (2 °C min <sup>-1</sup> ) in a flow of 500 ppm NO <sub>2</sub> 5 vol% O <sub>2</sub> , and the balanced N <sub>2</sub> with a rate of 100 mL min <sup>-1</sup> .              | O <sub>2</sub> TPD<br><150,<br>150–550,<br>>500 C | Feng <i>et al.</i> , <i>RSC Adv.</i> , 2015, 5, 91609              |



|     |                                               |     |                                                                                                   |     |                                                                            |
|-----|-----------------------------------------------|-----|---------------------------------------------------------------------------------------------------|-----|----------------------------------------------------------------------------|
| 16. | Au <sub>0.04</sub> /LaFeO <sub>3</sub> (3DOM) | 368 | Loose Contact, catalyst/soot =10:1, 5% O <sub>2</sub> and 0.2% NO in Ar (50 mLmin <sup>-1</sup> ) | TPO | Wei, <i>et al.</i> ,<br>Angew. Chem.,<br>Int. Ed., 2011,<br>50, 2326–2329. |
|-----|-----------------------------------------------|-----|---------------------------------------------------------------------------------------------------|-----|----------------------------------------------------------------------------|
